# Supplementary material for: The detection of faked identity using unexpected questions and choice reaction times
Source: Psychol Res. 2020 Sep 4;85(6):2474–82. doi: 10.1007/s00426-020-01410-4 (PMC8357779; doi:10.1007/s00426-020-01410-4)
Supplement: Supplementary file 1 — Supplementary file1 (XLSX 12 kb) [file 426_2020_1410_MOESM1_ESM.xlsx]

## Sheet: Training set
Subject_ID	IES Expected	IES Unexpected	RT wrong unexpected	RT wrong expected	Condition
1	1335.13	1699.38	0	1232	truth-teller
2	1860.57	2236.81	3393.25	980	truth-teller
3	1480.35	2136.08	1406	0	truth-teller
4	1522	2625.69	2835.8	0	truth-teller
5	2311.6	2581.19	1780	0	truth-teller
6	1571.4	2217.53	1654	0	truth-teller
7	1471.15	2736.57	3678.33	0	truth-teller
8	1402.05	2350.45	2240.11	0	truth-teller
9	1253.35	2523.85	4132.29	0	truth-teller
10	1136.6	1835.32	2516.67	0	truth-teller
11	1592.55	2073.57	3264.33	0	truth-teller
12	1464.15	2371.71	3771.2	0	truth-teller
13	1117.65	1597.03	977	0	truth-teller
14	1164.05	2064.82	1868.43	0	truth-teller
15	1116	1889.28	1760.12	0	truth-teller
16	1910.5	2594.05	8123	0	truth-teller
17	1281.47	2522.9	2846.9	1597	truth-teller
18	1389.25	1921.88	1777.29	0	truth-teller
19	1441.95	1745.29	1770.5	0	truth-teller
20	1219.5	2019.68	1861.5	0	truth-teller
21	1817.11	3540.54	2957.8	1423	liar
22	2177.32	7961.88	6679.64	2550	liar
23	2613.33	4487.37	2888	3067	liar
24	2032.87	3322.93	2584.88	2097.5	liar
25	2058.6	4131.34	2339.25	0	liar
26	1355.74	3265.71	2000.56	1281	liar
27	1910.61	4581.2	3348.71	1629.5	liar
28	1613.45	4453.46	2742.29	0	liar
29	1847.25	4284.69	2877.38	0	liar
30	2143.79	6901.36	4119.86	1567	liar
31	2746.88	5442.13	3349.73	2165.67	liar
32	1627.83	2348.93	2707.6	1599	liar
33	1422.05	3361.9	2287.93	1033	liar
34	2001.9	5744.8	4994.92	0	liar
35	2575.95	5979.16	4333	3918	liar
36	1513.53	3722.24	2166.82	858	liar
37	1600	4564.96	2659.88	0	liar
38	1541.15	3431.53	2553	0	liar
39	1602.68	3645.24	2421.21	1140	liar
40	1763.35	4472.38	2617.59	0	liar

## Sheet: Test set
Subject_ID	IES Expected	IES Unexpected	RT wrong unexpected	RT wrong expected	Condition
43	2076.65	3314.33	4612	0	truth-teller
42	2273.47	7270.74	4291.8	1006	liar
44	1065.05	1612.45	1372.56	0	truth-teller
45	1647.11	4710.41	3542.5	1672	liar
46	2054.35	4017.45	2723.5	0	liar
47	1478.5	2131.42	3853.5	0	truth-teller
48	1429.6	3244.76	2893.36	0	liar
49	1599.44	3458.63	2230.9	1551	liar
50	1357.16	1814.78	1645.67	1263	truth-teller
51	1340.45	2235.66	2548.8	0	truth-teller
